# Supplementary material for: Elicitation of Broadly Neutralizing Antibodies against B.1.1.7, B.1.351, and B.1.617.1 SARS-CoV-2 Variants by Three Prototype Strain-Derived Recombinant Protein Vaccines
Source: MDPI journal article supplement (doi:10.3390/v13081421), 2021-07-22
Supplement: s1 [file s1]

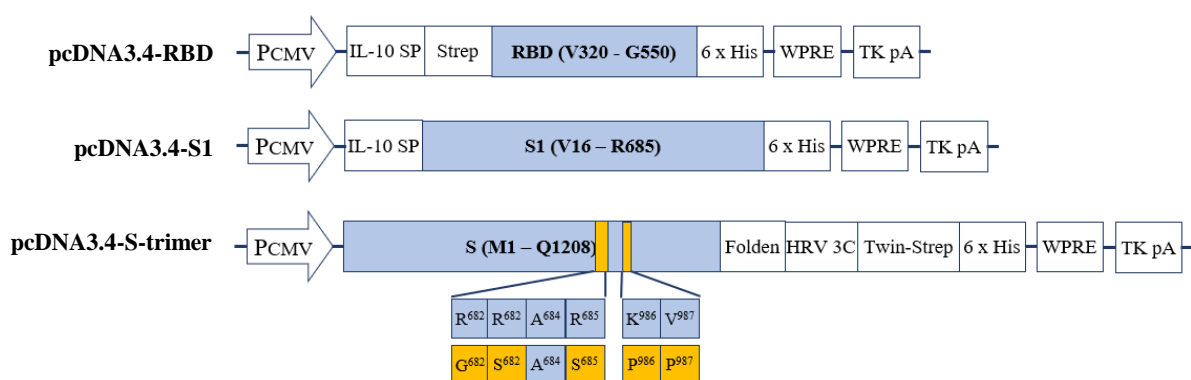

**Supplementary Figure S1.** Schematic diagrams of recombinant expression vectors used in this study. P<sub>CMV</sub>, human cytomegalovirus promoter; IL-10 SP, human interleukin 10 signal peptide; Strep, Strep-tag II; WPRE, woodchuck hepatitis virus posttranscriptional regulatory element; TK pA, herpes simplex virus thymidine kinase polyadenylation signal; Folden, T4 fibrin trimerization motif; HRV 3C site, human rhinovirus 3C protease cleavage site; Twin-Strep, Twin-Strep-tag. Note that recombinant S-trimer protein was stabilized by the “RRAR” to “GSAS” substitution to disrupt the furin S1/S2 cleavage site and the double proline mutation at the junction of heptad repeat 1 (HR1) and central helix (CH).

**A**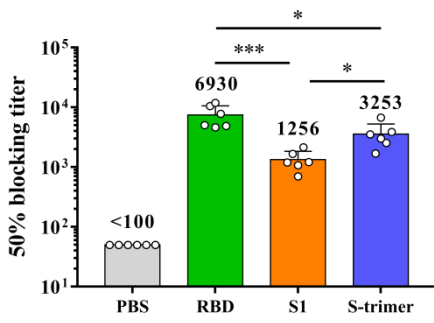**B**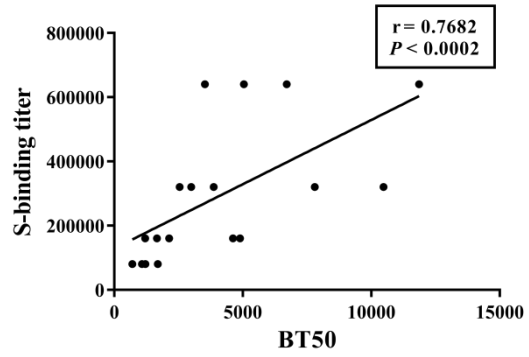

**Supplementary Figure S2.** Receptor binding-inhibition ability of the immune sera.

**(A)** The hACE2/S-trimer binding-inhibition titers of the week-18 anti-sera were determined by ELISA. Statistical significance was determined by Student's t-test and is indicated as follows: \*  $p < 0.05$ , \*\*  $p < 0.01$ , \*\*\*  $p < 0.001$ . Error bars represent SD. **(B)** Correlation between hACE2/S-trimer binding-blockade titers (BT50) and S-binding titers of the week-18 anti-sera. Spearman rank-correlation test was used.

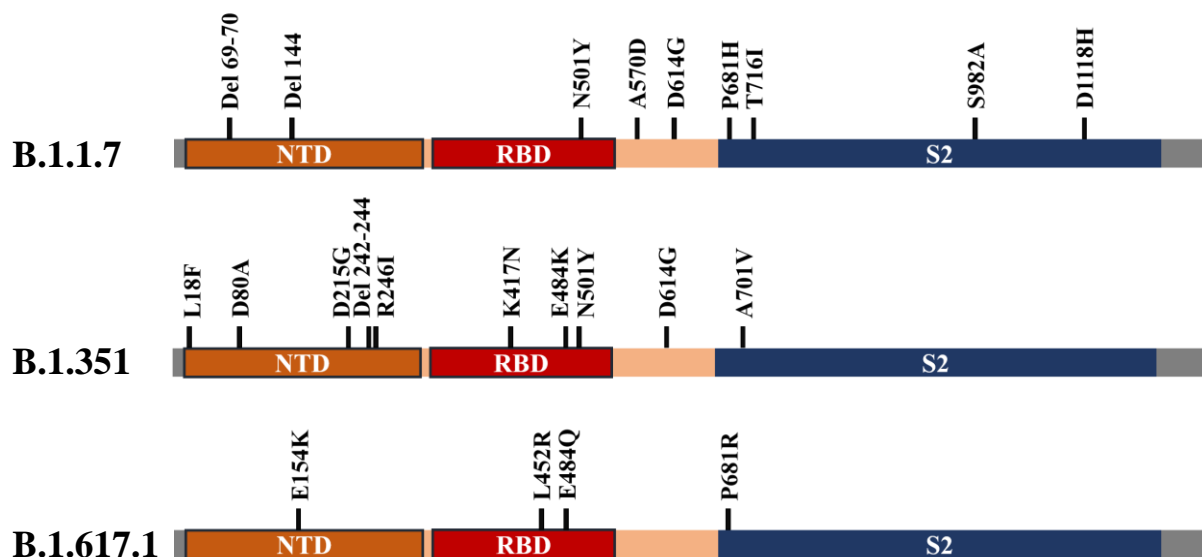

**Supplementary Figure S3.** Schematic diagrams of the spikes of SARS-CoV-2 variants B.1.1.7, B.1.351 and B.1.617.1. Mutations are shown at the top of each diagram.
